# Supplementary material for: Identification and Validation of a Novel Signature Based on NK Cell Marker Genes to Predict Prognosis and Immunotherapy Response in Lung Adenocarcinoma by Integrated Analysis of Single-Cell and Bulk RNA-Sequencing
Source: PubMed Central journal article supplement (PMC9231585; doi:10.3389/fimmu.2022.850745), 2022-06-10
Supplement: DataSheet_1.pdf [file DataSheet_1.pdf]

**Supplementary Table 1. Eight datasets used for analysis in our study**

| ID        | Platform                                           | Type       | Samples (used in this study) | Samples (Total) | URLs                                                                                                                                    |
|-----------|----------------------------------------------------|------------|------------------------------|-----------------|-----------------------------------------------------------------------------------------------------------------------------------------|
| TCGA-LUAD | Illumina HiSeq 2000                                | RNA-seq    | 500                          | 585             | <a href="https://xenabrowser.net/">https://xenabrowser.net/</a>                                                                         |
| GSE131907 | GPL16791(Illumina HiSeq 2500)                      | RNA-seq    | 11                           | 58              | <a href="https://www.ncbi.nlm.nih.gov/geo/query/acc.cgi?acc=GSE131907">https://www.ncbi.nlm.nih.gov/geo/query/acc.cgi?acc=GSE131907</a> |
| GSE30219  | GPL570 (Affymetrix HG U133 Plus 2.0)               | Microarray | 83                           | 307             | <a href="https://www.ncbi.nlm.nih.gov/geo/query/acc.cgi?acc=GSE30219">https://www.ncbi.nlm.nih.gov/geo/query/acc.cgi?acc=GSE30219</a>   |
| GSE3141   | GPL570 (Affymetrix HG U133 Plus 2.0)               | Microarray | 58                           | 111             | <a href="https://www.ncbi.nlm.nih.gov/geo/query/acc.cgi?acc=GSE3141">https://www.ncbi.nlm.nih.gov/geo/query/acc.cgi?acc=GSE3141</a>     |
| GSE50081  | GPL570 (Affymetrix HG U133 Plus 2.0)               | Microarray | 127                          | 181             | <a href="https://www.ncbi.nlm.nih.gov/geo/query/acc.cgi?acc=GSE50081">https://www.ncbi.nlm.nih.gov/geo/query/acc.cgi?acc=GSE50081</a>   |
| GSE26939  | GPL9053 (Agilent-4X44K)                            | Microarray | 115                          | 116             | <a href="https://www.ncbi.nlm.nih.gov/geo/query/acc.cgi?acc=GSE26939">https://www.ncbi.nlm.nih.gov/geo/query/acc.cgi?acc=GSE26939</a>   |
| GSE72094  | GPL15048 (Affymetrix Rosetta/Merck Human RSTA 2.0) | Microarray | 398                          | 442             | <a href="https://www.ncbi.nlm.nih.gov/geo/query/acc.cgi?acc=GSE72094">https://www.ncbi.nlm.nih.gov/geo/query/acc.cgi?acc=GSE72094</a>   |
| GSE31210  | GPL570 (Affymetrix HG U133 Plus 2.0)               | Microarray | 226                          | 246             | <a href="https://www.ncbi.nlm.nih.gov/geo/query/acc.cgi?acc=GSE31210">https://www.ncbi.nlm.nih.gov/geo/query/acc.cgi?acc=GSE31210</a>   |

**Supplementary Table 2. NK cell marker genes identified from GSE131907**

| No. | Gene     | No. | Gene    | No. | Gene     | No. | Gene     |
|-----|----------|-----|---------|-----|----------|-----|----------|
| 1   | TPSB2    | 32  | SAMSN1  | 63  | STX3     | 94  | CYTIP    |
| 2   | TPSAB1   | 33  | ADRB2   | 64  | HLA-A    | 95  | ID2      |
| 3   | CPA3     | 34  | FOSB    | 65  | RENBP    | 96  | EVL      |
| 4   | HPGDS    | 35  | PTGS1   | 66  | CD69     | 97  | RGS10    |
| 5   | MS4A2    | 36  | TMEM233 | 67  | LEO1     | 98  | PTGS2    |
| 6   | CTSG     | 37  | FCER1G  | 68  | ACOT7    | 99  | NFKBIZ   |
| 7   | GATA2    | 38  | LAT2    | 69  | CLIC1    | 100 | ITM2C    |
| 8   | HPGD     | 39  | CNRIP1  | 70  | SELK     | 101 | HLA-DPA1 |
| 9   | RGS13    | 40  | RAB27B  | 71  | LSP1     | 102 | CPM      |
| 10  | C1orf186 | 41  | BTK     | 72  | STMN1    | 103 | RGS2     |
| 11  | VWA5A    | 42  | SRGN    | 73  | HLA-C    | 104 | CTNBL1   |
| 12  | LTC4S    | 43  | CALB2   | 74  | MSRA     | 105 | LTB      |
| 13  | SLC18A2  | 44  | BACE2   | 75  | GPR65    | 106 | PEBP1    |
| 14  | CLU      | 45  | H3F3B   | 76  | ANKRD28  | 107 | CD2      |
| 15  | NFKBIA   | 46  | FTH1    | 77  | BTG1     | 108 | CD82     |
| 16  | LAPTM4A  | 47  | SMYD3   | 78  | SDCBP    | 109 | BEX4     |
| 17  | CD9      | 48  | SVOPL   | 79  | TMEM176B | 110 | ISG20    |
| 18  | KIT      | 49  | VIM     | 80  | ARHGEF6  | 111 | CD3E     |
| 19  | FCER1A   | 50  | MITF    | 81  | TRAC     | 112 | ALOX5    |
| 20  | DUSP6    | 51  | SLC45A3 | 82  | TSC22D1  | 113 | TRBC2    |
| 21  | LMNA     | 52  | STXBP6  | 83  | CORO1A   | 114 | FYB      |
| 22  | MAOB     | 53  | CSF1    | 84  | PLIN2    | 115 | ANXA2    |
| 23  | IL1RL1   | 54  | GRAP2   | 85  | HLA-DRB1 | 116 | BIRC3    |
| 24  | ANXA1    | 55  | HLA-B   | 86  | TNFSF10  | 117 | NSMCE1   |
| 25  | LMO4     | 56  | HINT1   | 87  | HLA-DPB1 | 118 | ARHGAP18 |
| 26  | HDC      | 57  | ACTG1   | 88  | ASAH1    | 119 | HLA-DQB1 |
| 27  | GLUL     | 58  | ZFP36L2 | 89  | PRDX6    | 120 | PPP1R15A |
| 28  | CD63     | 59  | CD74    | 90  | GALC     | 121 | HLA-DRA  |
| 29  | CAPG     | 60  | IL32    | 91  | CD3D     | 122 | CCL5     |
| 30  | GCSAML   | 61  | CXCR4   | 92  | BHLHE40  | 123 | DDIT4    |
| 31  | ACSL4    | 62  | HES1    | 93  | RGCC     | 124 | ITGB2    |

| No. | Gene     | No. | Gene     | No. | Gene  |
|-----|----------|-----|----------|-----|-------|
| 125 | RAB32    | 156 | CD3G     | 187 | APOC1 |
| 126 | ELL2     | 157 | DNAJB1   | 188 | CTSB  |
| 127 | HLA-DQA1 | 158 | ARID5B   | 189 | APOE  |
| 128 | DDAH2    | 159 | RORA     |     |       |
| 129 | VAPA     | 160 | LIMD2    |     |       |
| 130 | GYPC     | 161 | TWISTNB  |     |       |
| 131 | LCK      | 162 | CLEC2D   |     |       |
| 132 | YPEL5    | 163 | TUBA1A   |     |       |
| 133 | RGS1     | 164 | HLA-DMB  |     |       |
| 134 | HSD17B12 | 165 | NKG7     |     |       |
| 135 | TRBC1    | 166 | SGK1     |     |       |
| 136 | GLIPR1   | 167 | HOPX     |     |       |
| 137 | IL7R     | 168 | DUSP4    |     |       |
| 138 | GPR183   | 169 | COTL1    |     |       |
| 139 | HLA-DMA  | 170 | SOD2     |     |       |
| 140 | KDM6B    | 171 | FABP5    |     |       |
| 141 | AHR      | 172 | CTSS     |     |       |
| 142 | EZR      | 173 | IGKC     |     |       |
| 143 | ACAP1    | 174 | CTSZ     |     |       |
| 144 | EML4     | 175 | IGLC2    |     |       |
| 145 | CTSH     | 176 | CCL4     |     |       |
| 146 | GZMA     | 177 | SERPINA1 |     |       |
| 147 | TUBA4A   | 178 | S100A9   |     |       |
| 148 | CD7      | 179 | IGHA1    |     |       |
| 149 | PTPRC    | 180 | IGHG3    |     |       |
| 150 | STK17A   | 181 | C1QB     |     |       |
| 151 | S100A10  | 182 | IGLC3    |     |       |
| 152 | IL2RG    | 183 | IGHG1    |     |       |
| 153 | ARL4C    | 184 | C1QA     |     |       |
| 154 | SPOCK2   | 185 | IGHG4    |     |       |
| 155 | GADD45B  | 186 | LYZ      |     |       |

**Supplementary Table 3. Overall survival associated gene list in LUAD patients from TCGA**

| No. | Gene    | HR     | <i>p</i> value | No. | Gene    | HR    | <i>p</i> value |
|-----|---------|--------|----------------|-----|---------|-------|----------------|
| 1   | HPGDS   | 0.667  | 0.001          | 14  | SELENOK | 0.129 | 0.006          |
| 2   | MS4A2   | 0.702  | 0.004          | 15  | PEBP1   | 0.097 | 0.004          |
| 3   | CTSG    | 0.733  | 0.005          | 16  | BEX4    | 0.358 | 0.000          |
| 4   | RGS13   | 0.498  | 0.001          | 17  | ANXA2   | 6.089 | 0.003          |
| 5   | SLC18A2 | 0.638  | 0.002          | 18  | BIRC3   | 1.952 | 0.005          |
| 6   | KIT     | 0.700  | 0.008          | 19  | DDIT4   | 2.971 | 0.002          |
| 7   | HDC     | 0.674  | 0.004          | 20  | TRBC1   | 0.629 | 0.004          |
| 8   | GCSAML  | 0.592  | 0.006          | 21  | HLA-DMA | 0.359 | 0.001          |
| 9   | ADRB2   | 0.673  | 0.005          | 22  | ACAP1   | 0.525 | 0.002          |
| 10  | GRAP2   | 0.601  | 0.004          | 23  | CTSH    | 0.301 | 0.000          |
| 11  | ACTG1   | 34.327 | 0.002          | 24  | S100A10 | 5.692 | 0.003          |
| 12  | ACOT7   | 3.156  | 0.004          | 25  | HOPX    | 0.649 | 0.006          |
| 13  | CLIC1   | 20.077 | 0.002          |     |         |       |                |

**Supplementary Table 4. 124 genes that closely correlated with the signature**

| No. | Gene      | R     | <i>p</i> value | No. | Gene       | R     | <i>p</i> value |
|-----|-----------|-------|----------------|-----|------------|-------|----------------|
| 1   | SLC2A1    | 0.519 | 6.88E-36       | 39  | PRC1       | 0.429 | 8.90E-24       |
| 2   | ANLN      | 0.509 | 2.74E-34       | 40  | FOXM1      | 0.427 | 1.26E-23       |
| 3   | KCMF1     | 0.491 | 1.05E-31       | 41  | CMAS       | 0.426 | 1.87E-23       |
| 4   | SH2D5     | 0.489 | 1.89E-31       | 42  | B3GNT5     | 0.426 | 2.06E-23       |
| 5   | ERO1A     | 0.485 | 8.19E-31       | 43  | MAPK6      | 0.426 | 2.07E-23       |
| 6   | ARNTL2    | 0.484 | 9.21E-31       | 44  | VANGL1     | 0.425 | 2.15E-23       |
| 7   | HMGA1     | 0.481 | 2.29E-30       | 45  | LYAR       | 0.424 | 2.91E-23       |
| 8   | GAPDH     | 0.477 | 8.54E-30       | 46  | CRYBG2     | 0.424 | 2.97E-23       |
| 9   | BCAR3     | 0.474 | 2.51E-29       | 47  | ACOT7      | 0.424 | 3.30E-23       |
| 10  | FOSL1     | 0.467 | 1.95E-28       | 48  | PRR11      | 0.424 | 3.39E-23       |
| 11  | CREG2     | 0.461 | 9.99E-28       | 49  | PSMD2      | 0.424 | 2.86E-23       |
| 12  | LINC02178 | 0.461 | 1.18E-27       | 50  | KNL1       | 0.422 | 5.43E-23       |
| 13  | PLIN3     | 0.455 | 7.27E-27       | 51  | RAD51      | 0.422 | 5.17E-23       |
| 14  | MYO1E     | 0.454 | 7.55E-27       | 52  | INTS13     | 0.421 | 7.53E-23       |
| 15  | DSG2      | 0.454 | 8.01E-27       | 53  | LYPD3      | 0.421 | 6.44E-23       |
| 16  | EXO1      | 0.452 | 1.51E-26       | 54  | KRT18      | 0.421 | 5.97E-23       |
| 17  | LDHA      | 0.451 | 1.92E-26       | 55  | ORC1       | 0.421 | 6.99E-23       |
| 18  | PKM       | 0.451 | 2.32E-26       | 56  | FBXO45     | 0.42  | 8.74E-23       |
| 19  | GJB3      | 0.449 | 3.65E-26       | 57  | KIF14      | 0.42  | 7.87E-23       |
| 20  | PITX3     | 0.447 | 6.24E-26       | 58  | GALNT2     | 0.418 | 1.43E-22       |
| 21  | RHOF      | 0.446 | 9.44E-26       | 59  | CCNA2      | 0.418 | 1.41E-22       |
| 22  | AP1S3     | 0.446 | 7.90E-26       | 60  | KPNA2      | 0.418 | 1.29E-22       |
| 23  | PLK1      | 0.445 | 9.89E-26       | 61  | AP000695.2 | 0.418 | 1.51E-22       |
| 24  | LINC00941 | 0.445 | 1.03E-25       | 62  | ITGB1-DT   | 0.418 | 1.28E-22       |
| 25  | LAMC2     | 0.442 | 2.82E-25       | 63  | NCAPG      | 0.416 | 2.22E-22       |
| 26  | CD109     | 0.442 | 2.21E-25       | 64  | CEP55      | 0.416 | 2.72E-22       |
| 27  | ECT2      | 0.441 | 3.60E-25       | 65  | NTSR1      | 0.415 | 2.86E-22       |
| 28  | ARHGAP11A | 0.44  | 4.54E-25       | 66  | TPX2       | 0.415 | 3.19E-22       |
| 29  | AHNAK2    | 0.433 | 3.07E-24       | 67  | AC027237.1 | 0.415 | 3.45E-22       |
| 30  | RGS20     | 0.432 | 4.06E-24       | 68  | CTSV       | 0.414 | 4.15E-22       |
| 31  | EHBP1     | 0.431 | 5.50E-24       | 69  | VASP       | 0.413 | 5.14E-22       |
| 32  | TK1       | 0.43  | 5.74E-24       | 70  | DEPDC1     | 0.413 | 4.79E-22       |
| 33  | PSMD12    | 0.43  | 5.91E-24       | 71  | AC099850.3 | 0.413 | 5.66E-22       |
| 34  | VDAC1     | 0.43  | 6.45E-24       | 72  | TEAD4      | 0.412 | 6.28E-22       |
| 35  | PVR       | 0.429 | 7.96E-24       | 73  | KIF4A      | 0.412 | 5.96E-22       |
| 36  | RRM2      | 0.429 | 8.79E-24       | 74  | MKI67      | 0.412 | 6.90E-22       |
| 37  | SHCBP1    | 0.429 | 9.35E-24       | 75  | CFL1       | 0.412 | 6.52E-22       |
| 38  | BZW1      | 0.429 | 9.07E-24       | 76  | DTL        | 0.411 | 9.17E-22       |

| No. | Gene       | R     | <i>p</i> value | No. | Gene       | R      | <i>p</i> value |
|-----|------------|-------|----------------|-----|------------|--------|----------------|
| 77  | DIAPH3     | 0.41  | 9.67E-22       | 101 | SELENBP1   | -0.402 | 8.05E-21       |
| 78  | SMS        | 0.41  | 1.09E-21       | 102 | N4BP2L1    | -0.403 | 6.45E-21       |
| 79  | SLC16A3    | 0.41  | 1.04E-21       | 103 | GNG7       | -0.403 | 6.41E-21       |
| 80  | TUBA1C     | 0.408 | 1.86E-21       | 104 | LINC00892  | -0.404 | 4.18E-21       |
| 81  | KRT18P28   | 0.408 | 1.57E-21       | 105 | MTURN      | -0.405 | 3.63E-21       |
| 82  | ITGA5      | 0.408 | 1.89E-21       | 106 | AC087752.3 | -0.406 | 2.74E-21       |
| 83  | BUB1B      | 0.408 | 1.60E-21       | 107 | SLC25A42   | -0.407 | 2.21E-21       |
| 84  | CKAP2L     | 0.407 | 2.36E-21       | 108 | DAPK2      | -0.407 | 2.26E-21       |
| 85  | ERCC6L     | 0.407 | 2.51E-21       | 109 | METTL7A    | -0.409 | 1.26E-21       |
| 86  | SKA3       | 0.406 | 3.16E-21       | 110 | PPM1M      | -0.41  | 1.10E-21       |
| 87  | ADIPOR2    | 0.406 | 2.71E-21       | 111 | BTG2       | -0.41  | 1.17E-21       |
| 88  | PSMD1      | 0.405 | 3.59E-21       | 112 | FAM117A    | -0.411 | 8.84E-22       |
| 89  | SMCO2      | 0.405 | 3.73E-21       | 113 | PPIAP39    | -0.411 | 9.16E-22       |
| 90  | EIF4A3     | 0.404 | 4.42E-21       | 114 | CIRBP      | -0.413 | 5.36E-22       |
| 91  | KIF18A     | 0.404 | 4.81E-21       | 115 | TMEM125    | -0.421 | 6.27E-23       |
| 92  | AL161668.1 | 0.404 | 4.94E-21       | 116 | C16orf89   | -0.422 | 4.94E-23       |
| 93  | ITGB1      | 0.403 | 6.29E-21       | 117 | FRZB       | -0.425 | 2.42E-23       |
| 94  | CDC6       | 0.402 | 7.67E-21       | 118 | PTGDS      | -0.426 | 1.94E-23       |
| 95  | KIF2C      | 0.402 | 8.26E-21       | 119 | CMAHP      | -0.437 | 9.35E-25       |
| 96  | LRRC59     | 0.402 | 7.14E-21       | 120 | ZNF540     | -0.438 | 7.91E-25       |
| 97  | KRT8       | 0.402 | 7.26E-21       | 121 | SFTA3      | -0.439 | 5.22E-25       |
| 98  | AUNIP      | 0.402 | 6.88E-21       | 122 | CXCL17     | -0.45  | 2.35E-26       |
| 99  | ERLIN1     | 0.401 | 8.93E-21       | 123 | ACSS1      | -0.459 | 2.31E-27       |
| 100 | AC034223.2 | 0.401 | 9.23E-21       | 124 | NKX2-1     | -0.46  | 1.73E-27       |

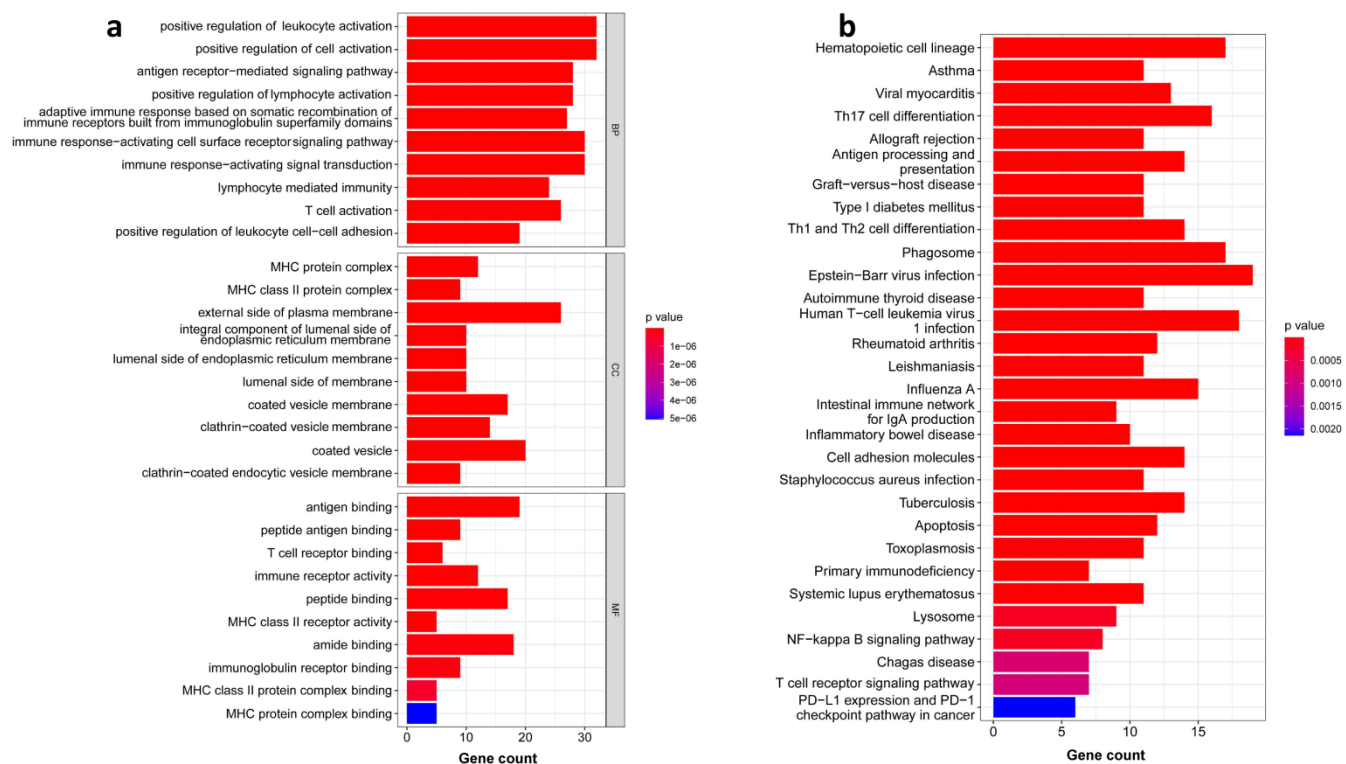

**Supplementary Figure 1.** Functional enrichment analysis of NK cell marker genes of LUAD. GO (a) and KEGG (b) analysis of the NK cell marker genes.

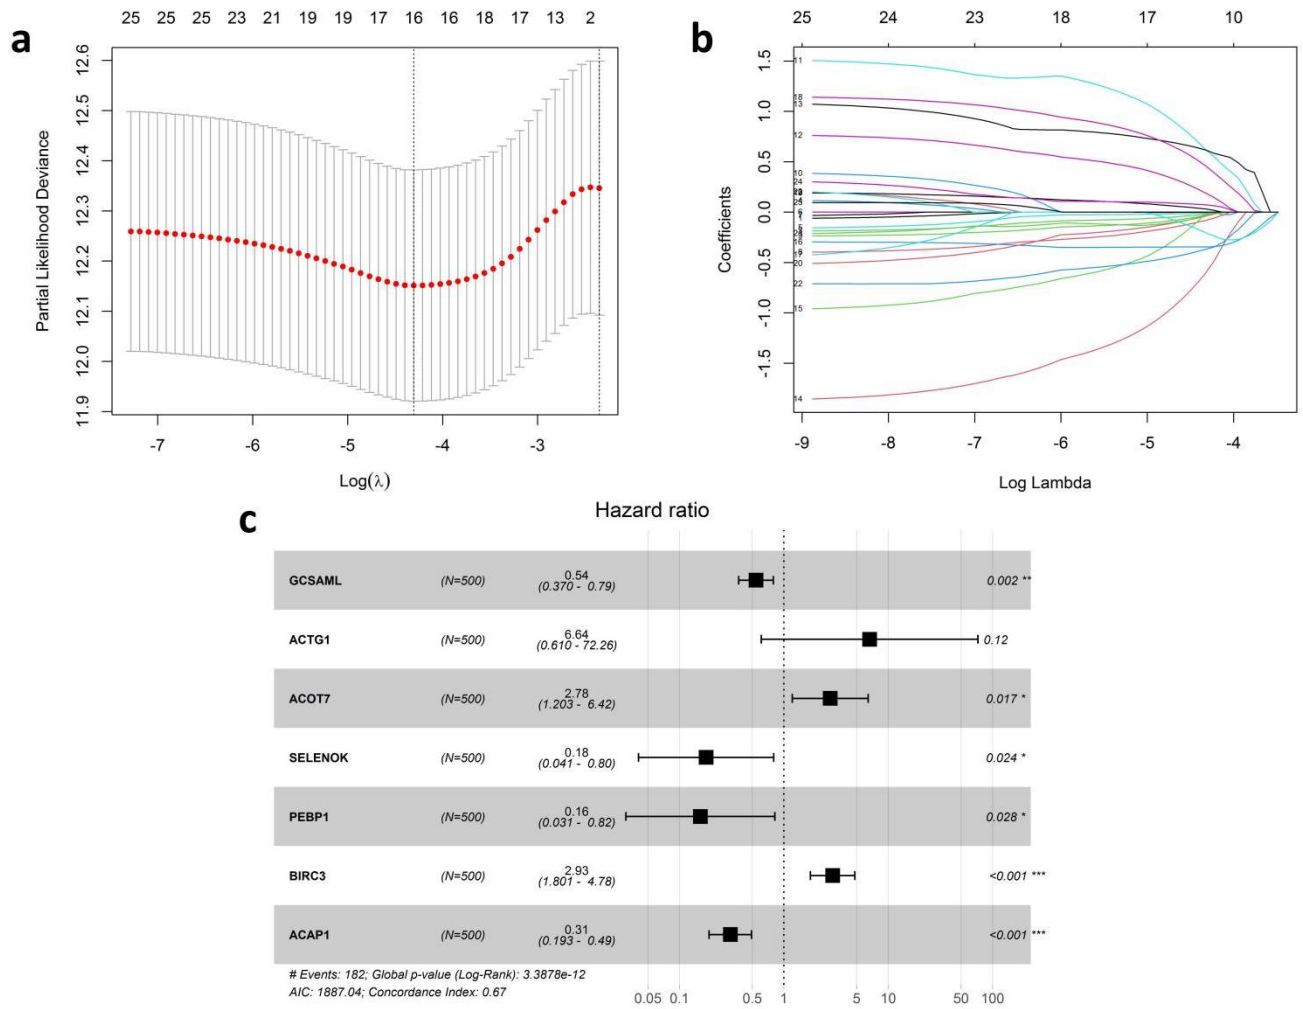

**Supplementary Figure 2.** Construction of NK cell marker genes signature in TCGA LUAD cohorts.

(a) LASSO coefficient profiles of the 25 prognostic genes. (b) 10-fold cross-validation for tuning parameter selection in the LASSO model. (c) Multivariable Cox proportional hazards regression analysis of the 7 prognostic genes.



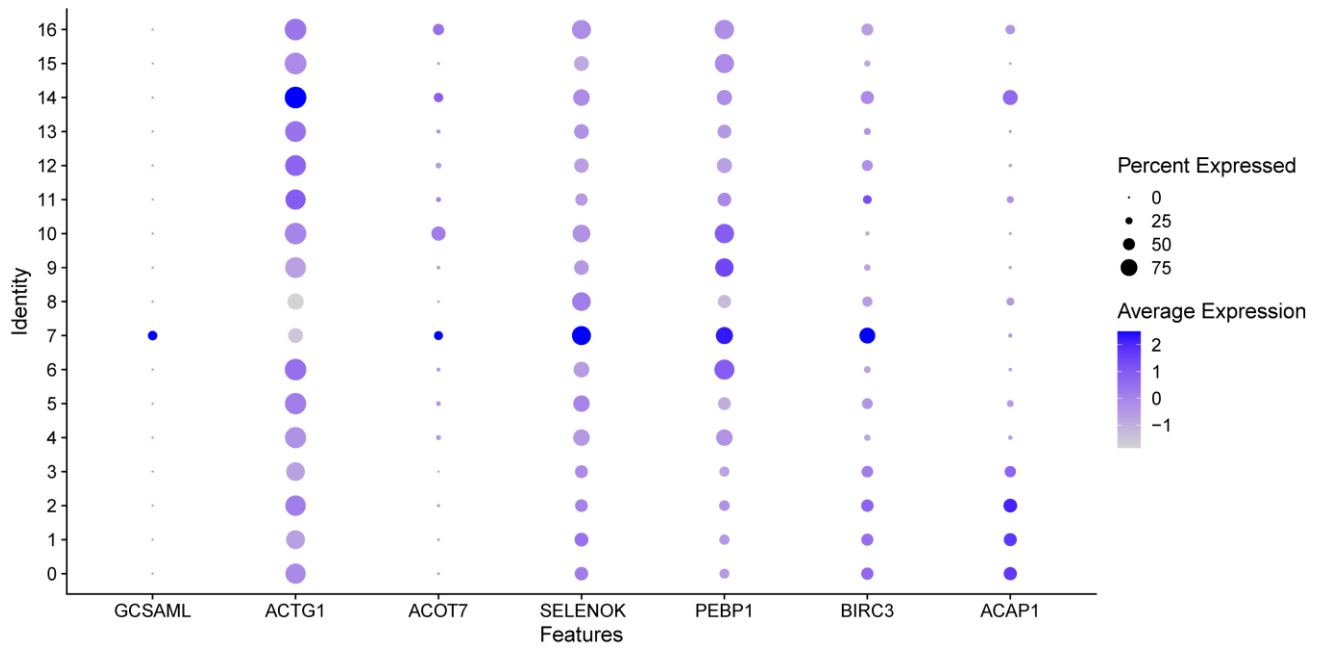

**Supplementary Figure 3.** Bubble plot showing the expression of NK cell marker genes included in the risk score model in various cell types. Bubble intensity of colour indicates the average expression in a particular cluster and bubble size represents the percent of cells expressing the gene in that cluster. Cluster 7 represents NK cells.

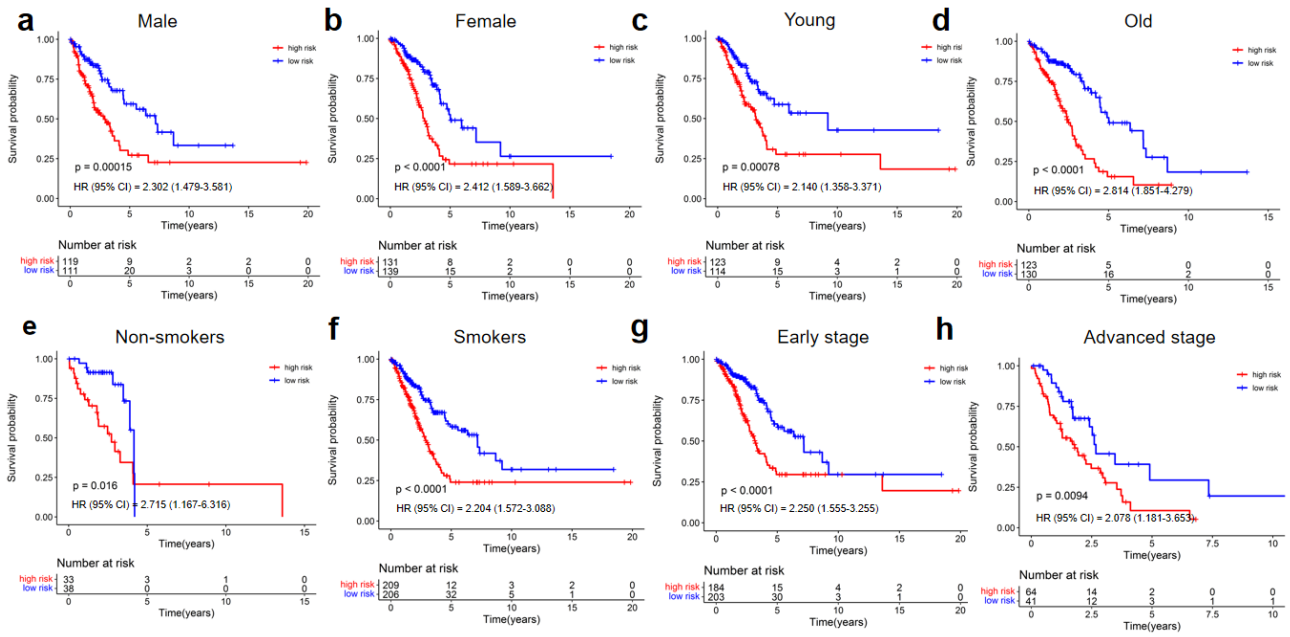

**Supplementary Figure 4.** Validation of the prognostic predictive ability of NK cell marker genes signature in different clinical subgroups. Kaplan–Meier curves of overall survival in male (a), female (b), young (c), old (d), non-smokers (e), smokers (f), early stage (g) and advanced stage (h) patients based on risk score in TCGA LUAD cohort.

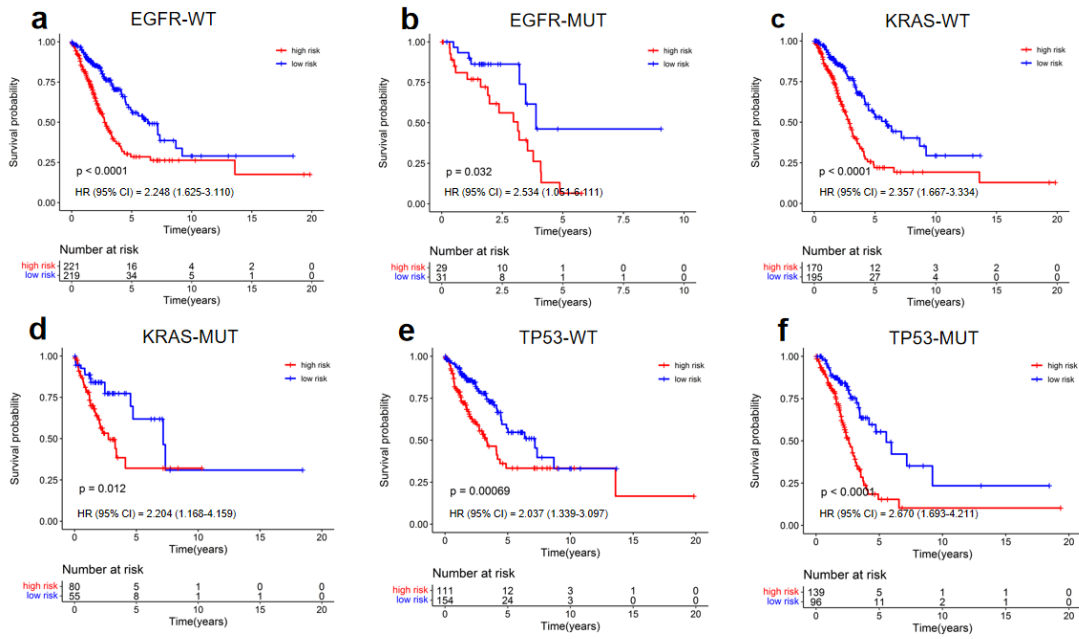

**Supplementary Figure 5.** Validation of the prognostic predictive ability of NK cell marker genes signature with different mutation status. Kaplan–Meier survival analysis of overall survival for patients with EGFR-WT (A), EGFR-MUT (B), KRAS-WT (C), KRAS-MUT (D), TP53-WT (E) and TP53-MUT (F) based on risk score in TCGA cohort. WT, wild-type; MUT, mutation.

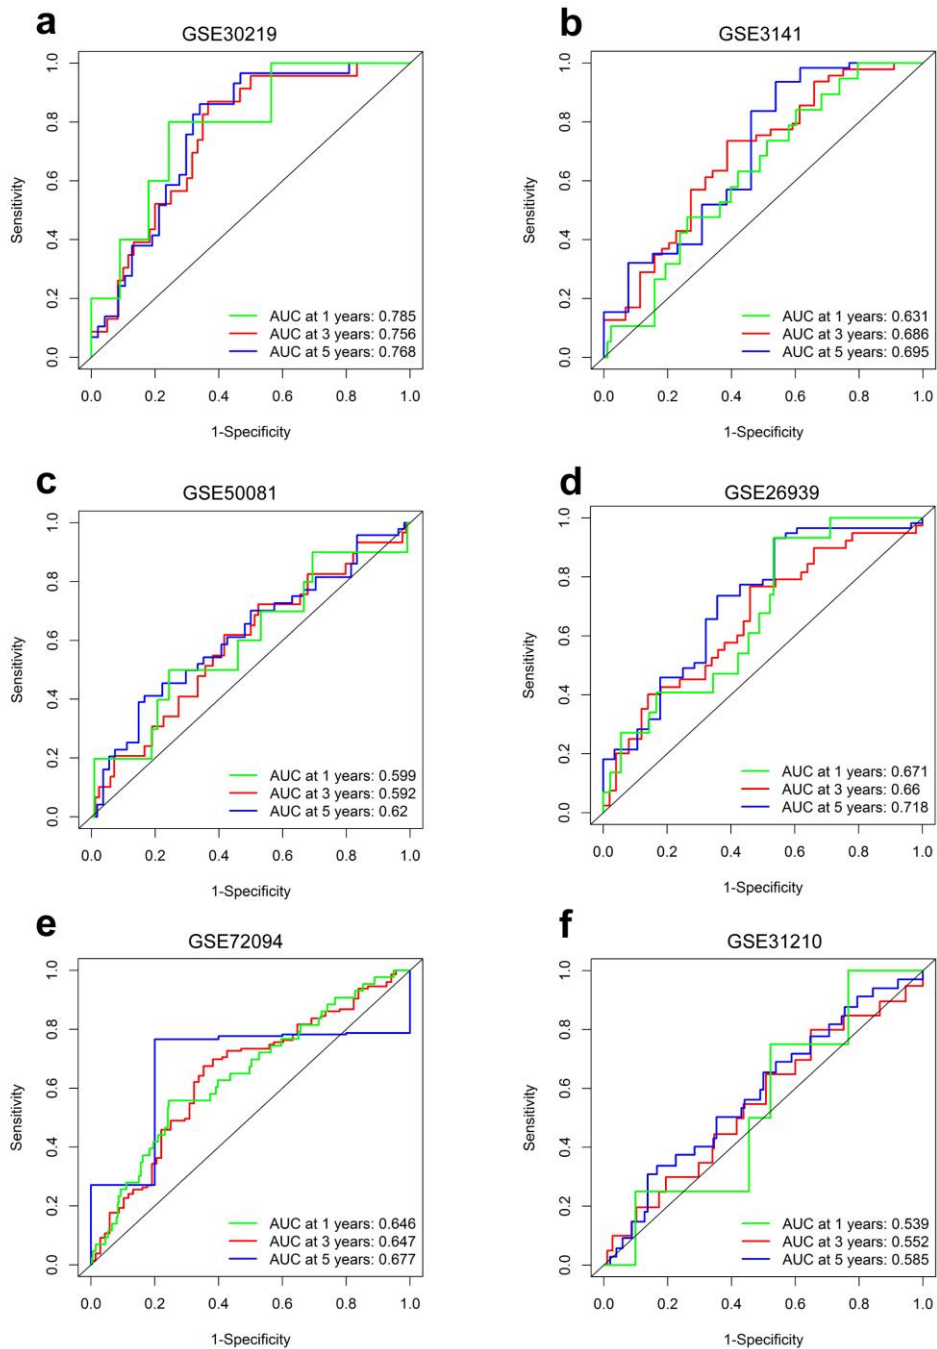

**Supplementary Figure 6.** Time-dependent ROC curves of risk score for predicting overall survival in GSE30219 cohort (a), GSE3141 cohort (b), GSE50081 cohort (c), GSE26939 cohort (d), GSE72094 cohort (e) and GSE31210 cohort (f).

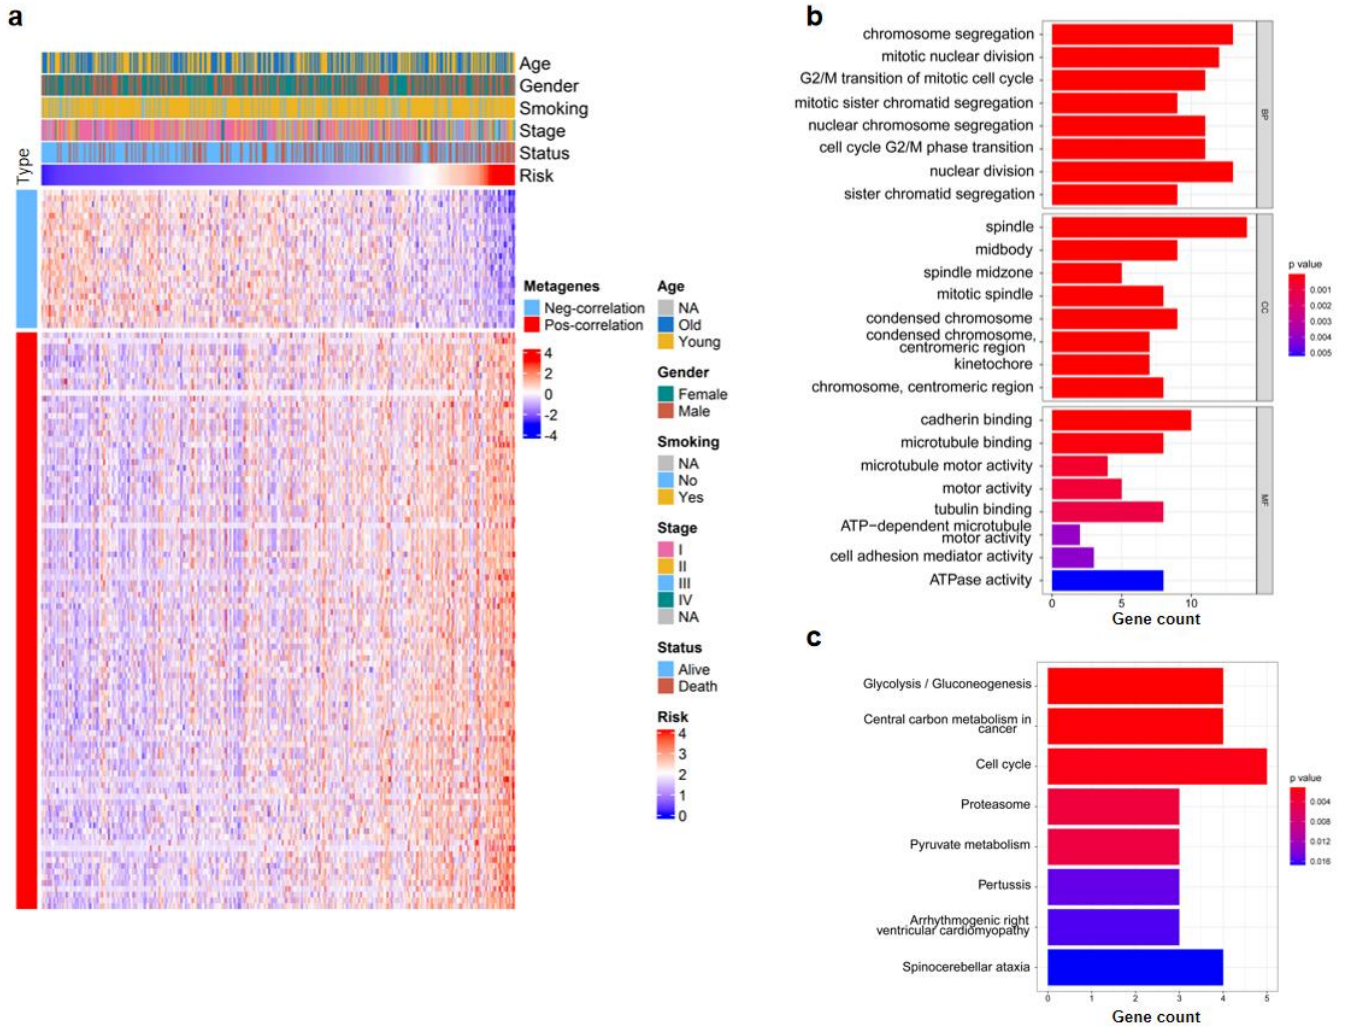

**Supplementary Figure 7.** Functional enrichment analysis of the NKCMGS related genes. (a) Heatmap showed the expression characteristics of 124 genes that closely correlated with the signature (Pearson  $|R| > 0.4$ ,  $P < 0.05$ ). (b) Barplot of GO analysis of the 124 genes. (c) Barplot of KEGG analysis of the 124 genes.

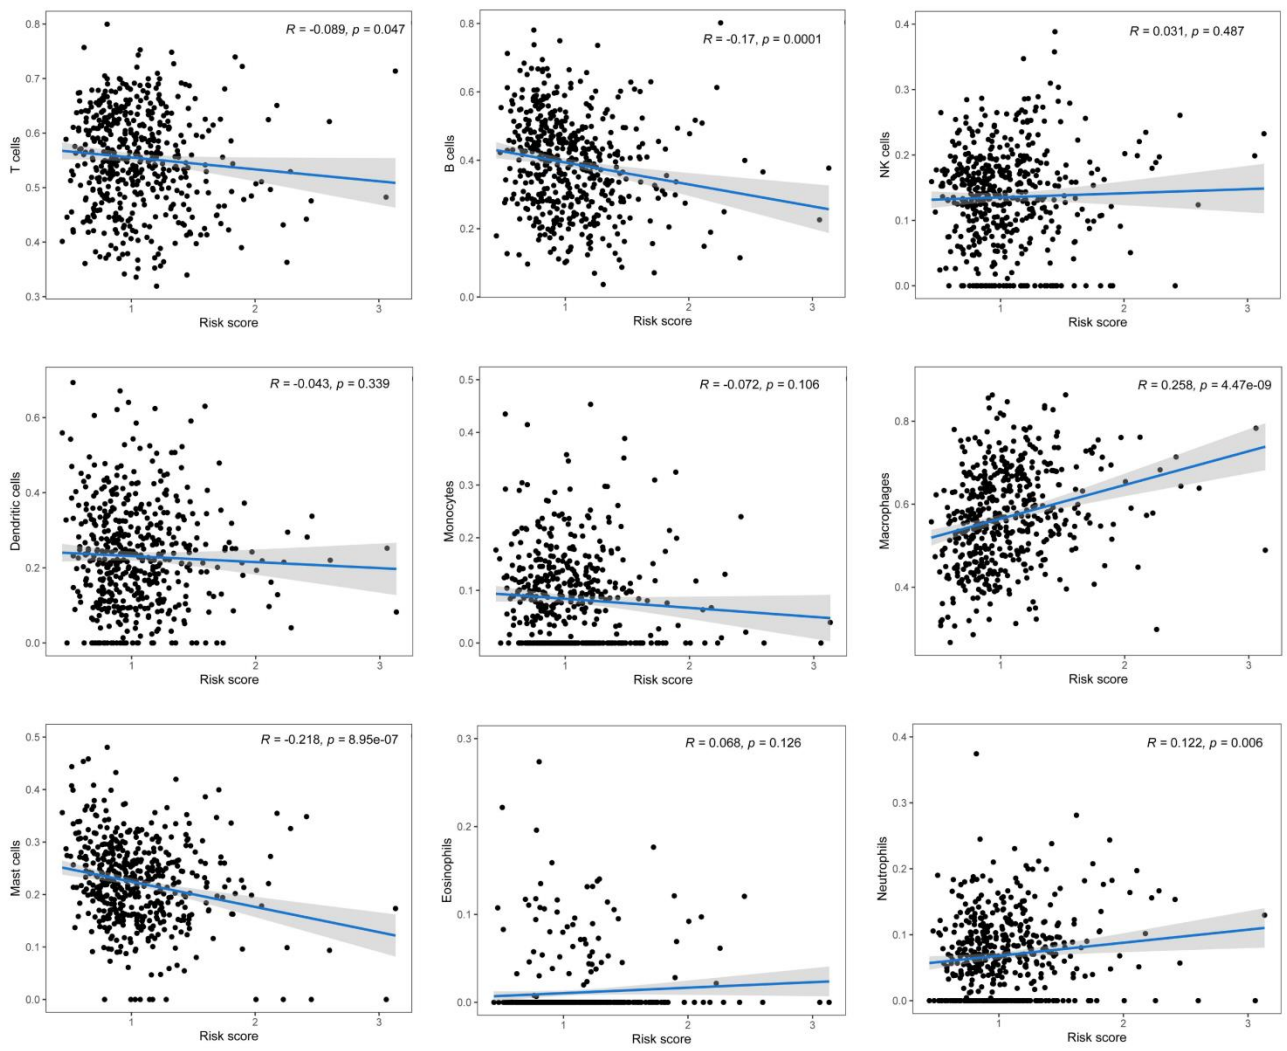

**Supplementary Figure 8.** The correlation analysis between estimated immune cell infiltration level and risk score.

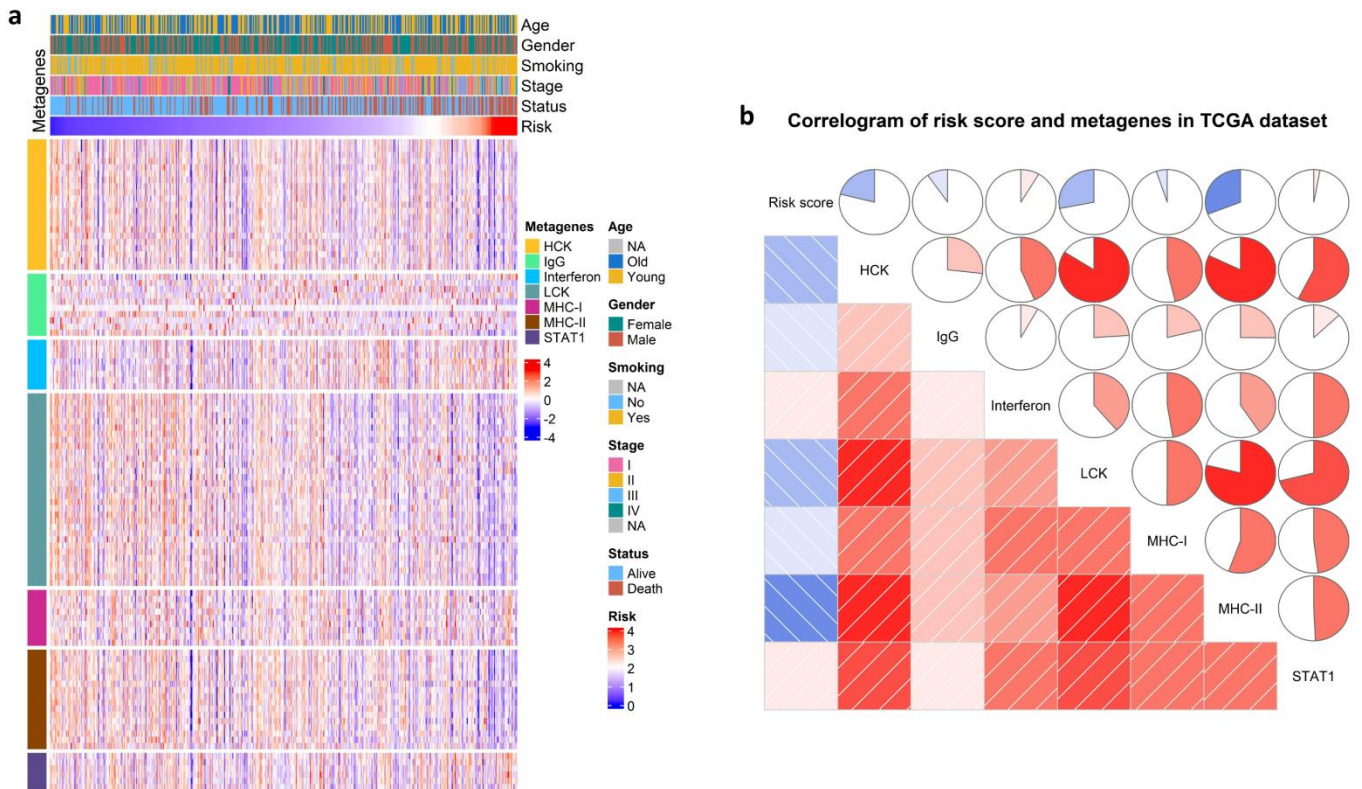

**Supplementary Figure 9.** Relationship between the NKCMGS and inflammatory metagenes in TCGA LUAD cohort. (a) Heatmap showed the expression characteristics of 7 clusters of metagenes. (b) The plot of Correlogram was produced by using Pearson R-value between metagenes and risk scores.
